# Supplementary material for: World regional differences in outcomes for patients with peripheral artery disease: Insights from the EUCLID trial
Source: PubMed Central journal article supplement (PMC8808360; doi:10.1177/1358863x211038620), 2021-09-13

## Supplement for World Regional Differences in Outcomes for Patients with Peripheral Artery Disease: EUCLID Trial

Table S1. Stepwise adjusted associations between region and clinical outcomes

| Clinical Outcome   | Central/South America |         | Asia             |         | North America    |         | Global   |
|--------------------|-----------------------|---------|------------------|---------|------------------|---------|----------|
|                    | HR (95% CI)           | P-value | HR (95% CI)      | P-value | HR (95% CI)      | P-value | P-value* |
| CV death/MI/Stroke | 0.85 (0.71–1.02)      | 0.077   | 1.01 (0.85–1.19) | 0.951   | 1.28 (1.13–1.45) | <.001   | <.001    |
| All-cause death    | 1.43 (1.21–1.68)      | <.001   | 1.14 (0.96–1.37) | 0.145   | 0.99 (0.85–1.15) | 0.864   | <.001    |
| LER                | 0.56 (0.45–0.70)      | <.001   | 0.74 (0.62–0.88) | <.001   | 1.55 (1.40–1.73) | <.001   | <.001    |

\*P-value from the overall association test. Reference is Europe. All outcomes adjusted for age, sex, inclusion criteria, and severity of disease. CV death/MI/stroke adjusted for diabetes, smoking, statins, and prior MI, stroke, and carotid stenosis or revascularization. All-cause death adjusted for diabetes, smoking, hyperlipidemia, statins, angiotensin receptor blockers, and prior MI, stroke, and carotid stenosis or revascularization. Lower extremity revascularization adjusted for diabetes, smoking, and prior carotid stenosis or revascularization. CI indicates confidence interval; CV, cardiovascular; HR, hazard ratio; LER, lower extremity revascularization; MI, myocardial infarction.

Figure S1. Kaplan Meier event curves for cardiovascular death

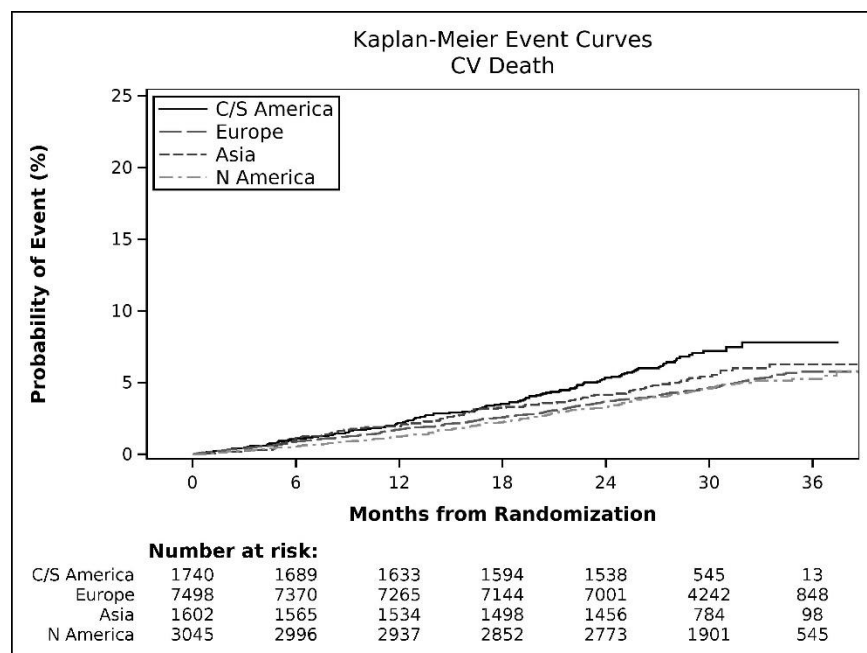

Figure S2. Kaplan Meier event curves for myocardial infarction (MI)

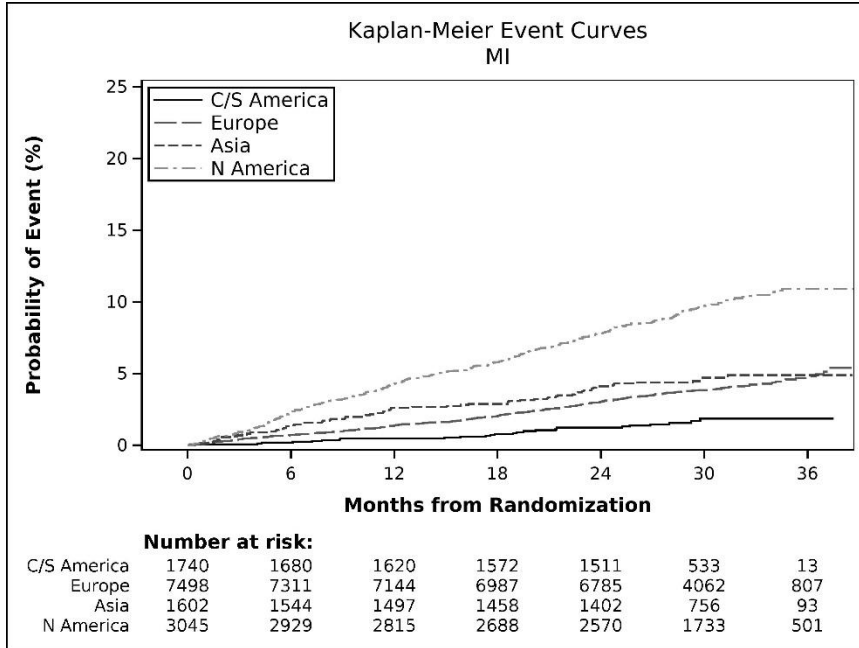

Figure S3. Kaplan Meier event curves for ischemic stroke

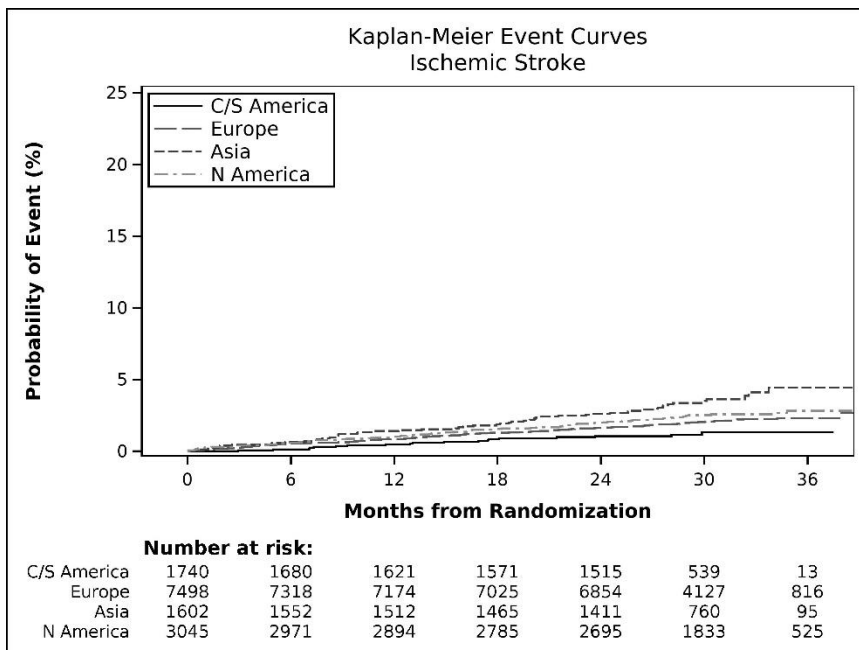

As a sensitivity analysis, the European region was divided into Western and Eastern Europe, which coincidentally coincides with the division based on the low- and high-risk classification for cardiovascular disease as specified by the 2016 European Guidelines on Cardiovascular Disease Prevention in Clinical Practice (Piepoli MF et al. *European Heart Journal* 2016;37:2315-81). Western Europe comprised France, Germany, Italy, Netherlands, Spain, Sweden, United Kingdom. Eastern Europe comprised Bulgaria, Czech Republic, Hungary, Poland, Romania, Russian Federation, Slovakia, Turkey, Ukraine. North America was then taken as the reference region. Results for this analysis are on the following pages.

**Table S2. Baseline Characteristics by Region**

| <b>Characteristic</b>                               | <b>North America<br/>(N=3045)</b> | <b>Central/South America<br/>(N=1740)</b> | <b>Asia<br/>(N=1602)</b> | <b>Western Europe<br/>(N=2373)</b> | <b>Eastern Europe<br/>(N=5125)</b> | <b>P-value</b> |
|-----------------------------------------------------|-----------------------------------|-------------------------------------------|--------------------------|------------------------------------|------------------------------------|----------------|
| Age, median (25th-75th), yrs                        | 67 (61-73)                        | 67 (61-74)                                | 70 (63-75)               | 67 (60-73)                         | 64 (59-70)                         | <.001          |
| Female sex, no. (%)                                 | 1066 (35.0%)                      | 664 (38.2%)                               | 330 (20.6%)              | 579 (24.4%)                        | 1249 (24.4%)                       | <.001          |
| Weight, median (25th-75th), kg                      | 82 (70-94)                        | 74 (65-84)                                | 62 (54-70)               | 78 (69-88)                         | 80 (70-89)                         | <.001          |
| <b>Inclusion Criteria for Randomization</b>         |                                   |                                           |                          |                                    |                                    | <.001          |
| Previous Revascularization, no. (%)                 | 2250 (73.9%)                      | 591 (34.0%)                               | 1162 (72.5%)             | 1513 (63.8%)                       | 2359 (46.0%)                       |                |
| ABI value, mean (SD)                                | 0.82 (0.21)                       | 0.70 (0.23)                               | 0.81 (0.25)              | 0.81 (0.23)                        | 0.72 (0.22)                        | <.001          |
| ABI or TBI criteria, no. (%)                        | 795 (26.1%)                       | 1149 (66.0%)                              | 440 (27.5%)              | 860 (36.2%)                        | 2766 (54.0%)                       |                |
| ABI value, mean (SD)                                | 0.64 (0.12)                       | 0.66 (0.20)                               | 0.62 (0.15)              | 0.63 (0.12)                        | 0.61 (0.14)                        | <.001          |
| TBI value, mean (SD)                                | 0.44 (0.16)                       | 0.57 (0.22)                               | 0.46 (0.12)              | 0.41 (0.16)                        | 0.61 (0.26)                        | <.001          |
| <b>Limb symptoms, no. (%)</b>                       |                                   |                                           |                          |                                    |                                    | <.001          |
| Asymptomatic                                        | 609 (20.0%)                       | 128 (7.4%)                                | 553 (34.5%)              | 640 (27.0%)                        | 671 (13.1%)                        |                |
| Mild or moderate claudication                       | 1629 (53.5%)                      | 998 (57.4%)                               | 730 (45.6%)              | 1239 (52.3%)                       | 2814 (54.9%)                       |                |
| Severe claudication                                 | 690 (22.7%)                       | 508 (29.2%)                               | 212 (13.2%)              | 427 (18.0%)                        | 1391 (27.1%)                       |                |
| Pain while at rest                                  | 97 (3.2%)                         | 51 (2.9%)                                 | 42 (2.6%)                | 22 (0.9%)                          | 166 (3.2%)                         |                |
| Minor tissue loss                                   | 16 (0.5%)                         | 44 (2.5%)                                 | 48 (3.0%)                | 40 (1.7%)                          | 59 (1.2%)                          |                |
| Major tissue loss                                   | 4 (0.1%)                          | 11 (0.6%)                                 | 17 (1.1%)                | 3 (0.1%)                           | 23 (0.4%)                          |                |
| Major amputation above the ankle                    | 49 (1.6%)                         | 108 (6.3%)                                | 45 (2.8%)                | 28 (1.2%)                          | 109 (2.1%)                         | <.001          |
| Minor amputation                                    | 76 (2.5%)                         | 175 (10.1%)                               | 82 (5.1%)                | 68 (2.9%)                          | 204 (4.0%)                         | <.001          |
| <b>Medical History, no. (%)</b>                     |                                   |                                           |                          |                                    |                                    |                |
| Stroke                                              | 209 (6.9%)                        | 126 (7.2%)                                | 258 (16.1%)              | 131 (5.5%)                         | 419 (8.2%)                         | <.001          |
| TIA                                                 | 191 (6.3%)                        | 42 (2.4%)                                 | 62 (3.9%)                | 86 (3.6%)                          | 126 (2.5%)                         | <.001          |
| CAD                                                 | 1437 (47.2%)                      | 449 (25.8%)                               | 308 (19.2%)              | 588 (24.8%)                        | 1250 (24.4%)                       | <.001          |
| MI                                                  | 762 (25.0%)                       | 319 (18.3%)                               | 158 (9.9%)               | 351 (14.8%)                        | 932 (18.2%)                        | <.001          |
| Carotid stenosis or carotid revascularization       | 897 (29.7%)                       | 122 (7.4%)                                | 182 (13.2%)              | 345 (15.1%)                        | 981 (20.5%)                        | <.001          |
| Diabetes mellitus type I or II                      | 1220 (40.1%)                      | 989 (56.8%)                               | 689 (43.0%)              | 779 (32.9%)                        | 1668 (32.5%)                       | <.001          |
| Hypertension                                        | 2627 (86.3%)                      | 1350 (77.6%)                              | 1123 (70.1%)             | 1792 (75.6%)                       | 3965 (77.4%)                       | <.001          |
| Hyperlipidemia                                      | 2814 (92.4%)                      | 1232 (70.8%)                              | 883 (55.1%)              | 1942 (81.9%)                       | 3609 (70.4%)                       | <.001          |
| <b>Tobacco use, no. (%)</b>                         |                                   |                                           |                          |                                    |                                    | <.001          |
| Current                                             | 1029 (33.8%)                      | 385 (22.1%)                               | 373 (23.3%)              | 767 (33.5%)                        | 1735 (33.9%)                       |                |
| Former                                              | 1664 (54.6%)                      | 801 (46.0%)                               | 844 (52.7%)              | 1254 (54.7%)                       | 1967 (38.4%)                       |                |
| Never                                               | 352 (11.6%)                       | 554 (31.8%)                               | 385 (24.0%)              | 270 (11.8%)                        | 1423 (27.8%)                       |                |
| <b>Medication use before randomization, no. (%)</b> |                                   |                                           |                          |                                    |                                    |                |
| Aspirin                                             | 2327 (76.4%)                      | 1089 (62.6%)                              | 905 (56.5%)              | 1790 (75.5%)                       | 3160 (61.7%)                       | <.001          |
| Clopidogrel                                         | 1539 (50.5%)                      | 217 (12.5%)                               | 551 (34.4%)              | 684 (28.8%)                        | 1482 (28.9%)                       | <.001          |
| Statin                                              | 2572 (84.5%)                      | 1134 (65.2%)                              | 1012 (63.2%)             | 2004 (84.5%)                       | 3459 (67.5%)                       | <.001          |
| ACE Inhibitor                                       | 1381 (45.4%)                      | 706 (40.6%)                               | 205 (12.8%)              | 998 (42.1%)                        | 2345 (45.8%)                       | <.001          |
| Angiotensin-receptor blocker                        | 725 (23.8%)                       | 526 (30.2%)                               | 583 (36.4%)              | 639 (26.9%)                        | 1015 (19.8%)                       | <.001          |
| Cilostazol                                          | 392 (12.9%)                       | 691 (39.7%)                               | 760 (47.4%)              | 167 (7.0%)                         | 85 (1.7%)                          | <.001          |

ABI indicates angle-brachial index; ACE, angiotensin converting enzyme; ARB, angiotensin receptor blocker; CAD, coronary artery disease; MI, myocardial infarction; SD, standard deviation; TBI, toe-brachial index; TIA, transient ischemic attack.

**Table S3. Unadjusted Associations Between Region and Clinical Outcomes**

| Clinical Outcome   | Central/South America |                       |         | Asia               |                       |         | Western Europe     |                       |         | Eastern Europe     |                       |         | North America         | Global P-value* |       |
|--------------------|-----------------------|-----------------------|---------|--------------------|-----------------------|---------|--------------------|-----------------------|---------|--------------------|-----------------------|---------|-----------------------|-----------------|-------|
|                    | Incidence Rate (n)    | HR (95% CI)           | P-value | Incidence Rate (n) | HR (95% CI)           | P-value | Incidence Rate (n) | HR (95% CI)           | P-value | Incidence Rate (n) | HR (95% CI)           | P-value | Incidence Rate (n)    |                 |       |
| CV death/MI/Stroke | 3.87 (151)            | 0.65<br>(0.54 - 0.78) | <.001   | 4.80 (180)         | 0.80<br>(0.67 - 0.95) | 0.012   | 3.66 (214)         | 0.61<br>(0.52 - 0.72) | <.001   | 4.09 (510)         | 0.68<br>(0.60 - 0.78) | <.001   | 5.97 (436)            | <.001           |       |
| CV death           | 2.88 (114)            | 1.57<br>(1.23 - 2.01) | <.001   | 2.23 (87)          | 1.21<br>(0.93 - 1.58) | 0.163   | 1.12 (68)          | 0.61<br>(0.45 - 0.81) | <.001   | 2.30 (294)         | 1.24<br>(1.02 - 1.52) | 0.032   | 1.85 (143)            | <.001           |       |
| MI                 | 0.66 (26)             | 0.17<br>(0.11 - 0.25) | <.001   | 1.87 (71)          | 0.68<br>(0.48 - 0.96) | 0.028   | 2.12 (125)         | 0.53<br>(0.43 - 0.66) | <.001   | 1.34 (169)         | 0.34<br>(0.28 - 0.41) | <.001   | 3.96 (292)            | <.001           |       |
| Stroke             | 0.48 (19)             | 0.49<br>(0.30 - 0.81) | 0.006   | 1.44 (55)          | 0.33<br>(0.22 - 0.48) | 0.032   | 0.70 (42)          | 1.46<br>(1.03 - 2.08) | 0.092   | 0.87 (110)         | 0.72<br>(0.49 - 1.05) | 0.439   | 0.89<br>(0.66 - 1.20) | 0.97 (74)       | <.001 |
| All-cause death    | 5.05 (203)            | 1.46<br>(1.21 - 1.75) | <.001   | 4.49 (176)         | 1.28<br>(1.06 - 1.55) | 0.010   | 2.71 (167)         | 0.77<br>(0.64 - 0.93) | 0.008   | 3.43 (440)         | 0.98<br>(0.84 - 1.14) | 0.774   | 3.51 (277)            | <.001           |       |
| ALI                | 0.33 (13)             | 0.44<br>(0.24 - 0.80) | 0.007   | 0.60 (23)          | 0.80<br>(0.49 - 1.30) | 0.372   | 0.67 (40)          | 0.91<br>(0.61 - 1.37) | 0.655   | 0.79 (100)         | 1.07<br>(0.77 - 1.49) | 0.679   | 0.74 (56)             | 0.038           |       |
| LER                | 2.49 (95)             | 0.26<br>(0.21 - 0.33) | <.001   | 4.10 (150)         | 0.44<br>(0.37 - 0.52) | <.001   | 8.04 (433)         | 0.86<br>(0.76 - 0.98) | 0.019   | 3.53 (429)         | 0.38<br>(0.34 - 0.43) | <.001   | 9.33 (631)            | <.001           |       |

\*Global P-value from the overall association test. Reference is North America. HR (95% CI) and p-values for MI in Asia correspond to time intervals (0,365) and (365,...) days, respectively.

Incidence rate: number of events (n) per 100 patient years.

ALI indicates acute limb ischemia; CI, confidence interval; CV, cardiovascular; HR, hazard ratio; LER, lower extremity revascularization; MI, myocardial infarction.

**Table S4. Adjusted Associations Between Region and Clinical Outcomes**

| Clinical Outcome   | Central/South America |         | Asia               |         | Western Europe     |         | Eastern Europe     |         | Global P-value*    |       |       |
|--------------------|-----------------------|---------|--------------------|---------|--------------------|---------|--------------------|---------|--------------------|-------|-------|
|                    | HR (95% CI)           | P-value | HR (95% CI)        | P-value | HR (95% CI)        | P-value | HR (95% CI)        | P-value |                    |       |       |
| CV death/MI/Stroke | 0.66 (0.54 - 0.79)    | <.001   | 0.75 (0.63 - 0.89) | 0.001   | 0.65 (0.55 - 0.76) | <.001   | 0.75 (0.65 - 0.85) | <.001   | <.001              |       |       |
| Model 1            | 0.74 (0.61 - 0.90)    | 0.003   | 0.86 (0.72 - 1.03) | 0.108   | 0.74 (0.63 - 0.88) | <.001   | 0.84 (0.73 - 0.96) | 0.012   | 0.003              |       |       |
| Model 2            | 0.69 (0.57 - 0.84)    | <.001   | 0.80 (0.66 - 0.97) | 0.020   | 0.74 (0.62 - 0.87) | <.001   | 0.84 (0.73 - 0.97) | 0.016   | <.001              |       |       |
| Model 3            | 0.69 (0.57 - 0.84)    | <.001   | 0.80 (0.66 - 0.97) | 0.026   | 0.75 (0.63 - 0.89) | 0.001   | 0.84 (0.73 - 0.97) | 0.018   | 0.001              |       |       |
| CV death           | 1.53 (1.18 - 1.97)    | 0.001   | 1.11 (0.84 - 1.45) | 0.466   | 0.65 (0.49 - 0.87) | 0.004   | 1.37 (1.11 - 1.68) | 0.003   | <.001              |       |       |
| MI                 | 0.18 (0.12 - 0.27)    | <.001   | 0.65 (0.46 - 0.92) | 0.015   | 0.57 (0.46 - 0.70) | <.001   | 0.38 (0.31 - 0.46) | <.001   | <.001              |       |       |
| Stroke             | 0.48 (0.29 - 0.81)    | 0.005   | 0.31 (0.21 - 0.46) | <.001   | 1.34 (0.94 - 1.91) | 0.107   | 0.73 (0.50 - 1.07) | 0.103   | 0.93 (0.69 - 1.27) | 0.653 | 0.001 |
| All-cause death    | 1.49 (1.23 - 1.79)    | <.001   | 1.16 (0.96 - 1.41) | 0.127   | 0.82 (0.68 - 0.99) | 0.044   | 1.11 (0.95 - 1.30) | 0.189   | <.001              |       |       |
| Model 1            | 1.55 (1.28 - 1.87)    | <.001   | 1.22 (1.00 - 1.50) | 0.047   | 0.86 (0.71 - 1.05) | 0.138   | 1.14 (0.97 - 1.34) | 0.109   | <.001              |       |       |
| Model 2            | 1.45 (1.19 - 1.76)    | <.001   | 1.10 (0.89 - 1.35) | 0.366   | 0.81 (0.66 - 1.00) | 0.046   | 1.11 (0.94 - 1.31) | 0.238   | <.001              |       |       |
| Model 3            | 1.47 (1.21 - 1.79)    | <.001   | 1.15 (0.93 - 1.42) | 0.195   | 0.84 (0.69 - 1.04) | 0.103   | 1.11 (0.94 - 1.31) | 0.222   | <.001              |       |       |
| ALI                | 0.69 (0.38 - 1.28)    | 0.238   | 0.86 (0.52 - 1.40) | 0.541   | 1.04 (0.69 - 1.57) | 0.837   | 1.43 (1.02 - 2.00) | 0.039   | 0.029              |       |       |
| LER                | 0.35 (0.28 - 0.43)    | <.001   | 0.47 (0.39 - 0.56) | <.001   | 0.96 (0.85 - 1.09) | 0.519   | 0.45 (0.40 - 0.51) | <.001   | <.001              |       |       |
| Model 1            | 0.36 (0.29 - 0.45)    | <.001   | 0.48 (0.40 - 0.57) | <.001   | 0.99 (0.87 - 1.13) | 0.885   | 0.46 (0.41 - 0.53) | <.001   | <.001              |       |       |
| Model 2            | 0.36 (0.29 - 0.46)    | <.001   | 0.49 (0.41 - 0.60) | <.001   | 1.02 (0.90 - 1.16) | 0.741   | 0.48 (0.42 - 0.55) | <.001   | <.001              |       |       |
| Model 3            | 0.36 (0.29 - 0.45)    | <.001   | 0.50 (0.41 - 0.61) | <.001   | 1.03 (0.90 - 1.17) | 0.678   | 0.48 (0.42 - 0.55) | <.001   | <.001              |       |       |

\*P-value from the overall association test. Reference is North America.

Hazard ratios, 95% confidence intervals, and p-values for MI in Asia correspond to time intervals [0,365] and [365,...] days, respectively.

All outcomes adjusted for age, sex, inclusion criteria, and severity of disease.

Model 1 adjusts for concomitant cardiovascular diseases (prior stroke, carotid stenosis or revascularization, MI, PCI, CABG).

Model 2 adds cardiovascular disease risk factors to Model 1 (diabetes, smoking, hypertension, hyperlipidemia).

Model 3 adds preventive medications to Model 2 (statins, angiotensin-receptive blockers, ACE inhibitors).

HR, hazard ratio; CI, confidence interval; CV, cardiovascular; MI, myocardial infarction; ALI, acute limb ischemia; LER, lower extremity revascularization.

Figure S4. Kaplan Meier event curves for CV death, MI, or ischemic stroke

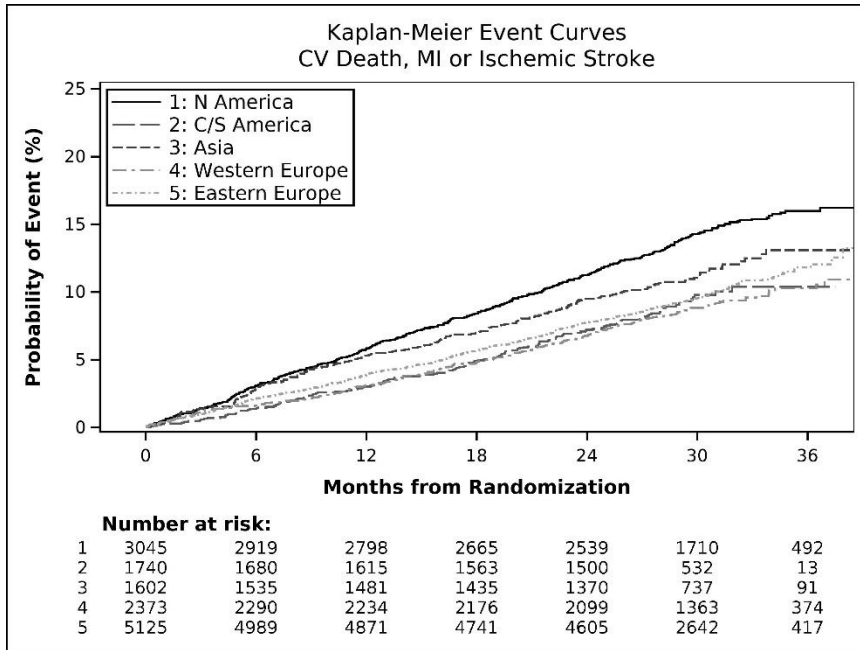

Figure S5. Kaplan Meier event curves for CV death

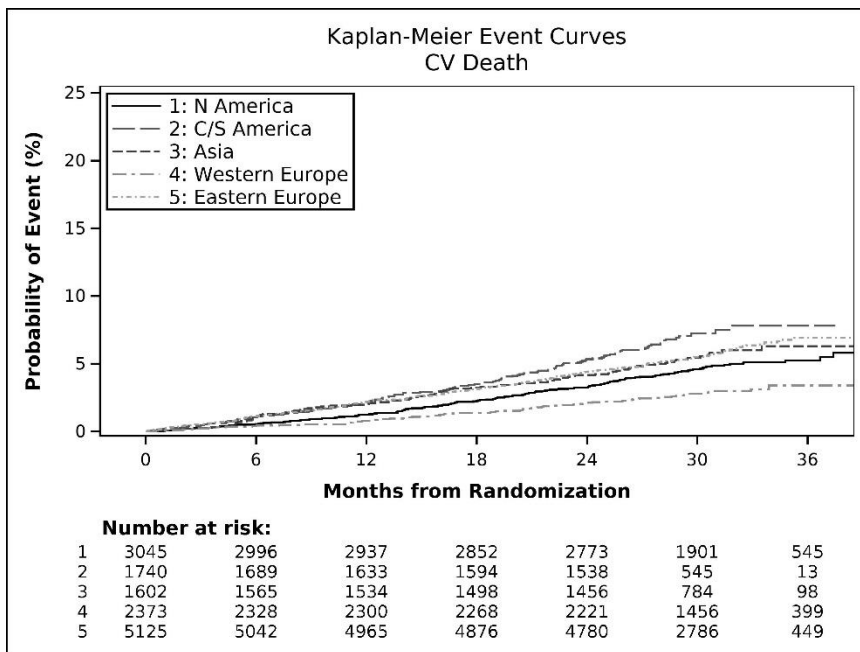

Figure S6. Kaplan Meier event curves for MI

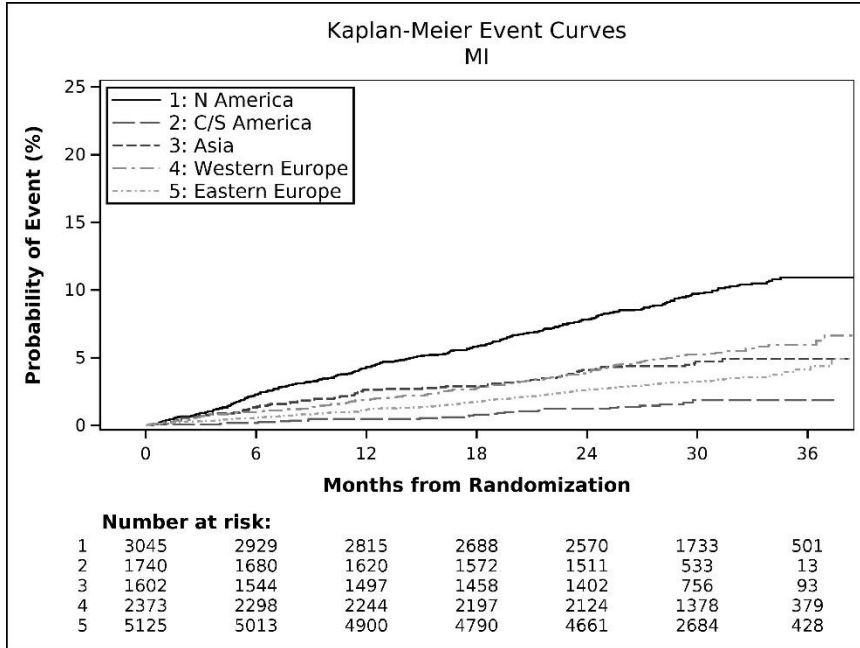

Figure S7. Kaplan Meier event curves for ischemic stroke

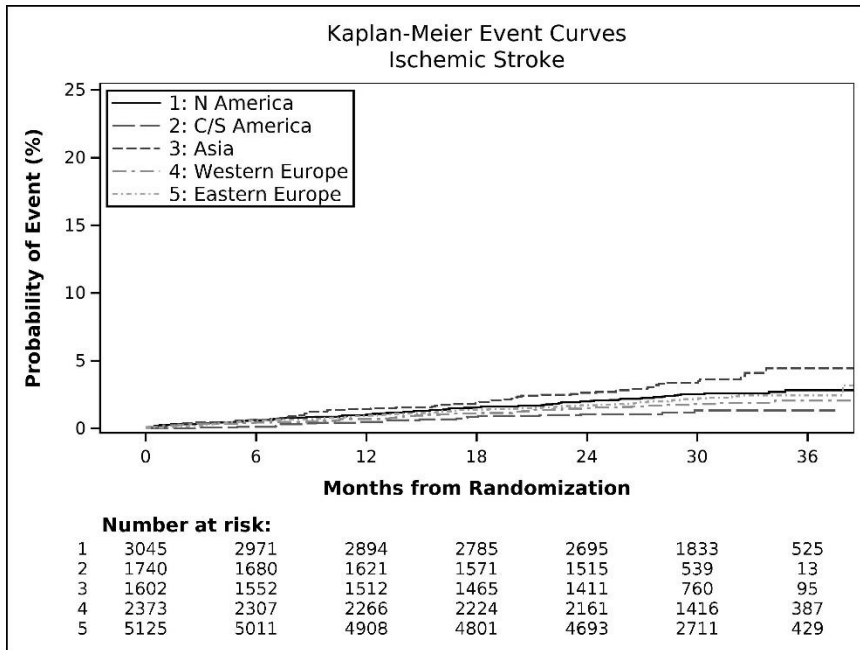



Figure S8. Kaplan Meier event curves for all-cause death

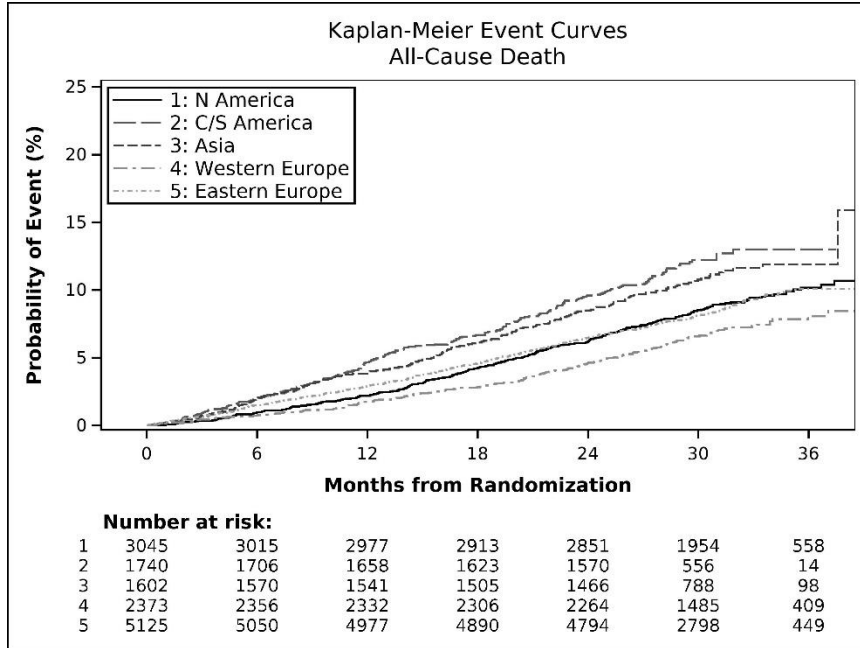

Figure S9. Kaplan Meier event curves for ALI hospitalization

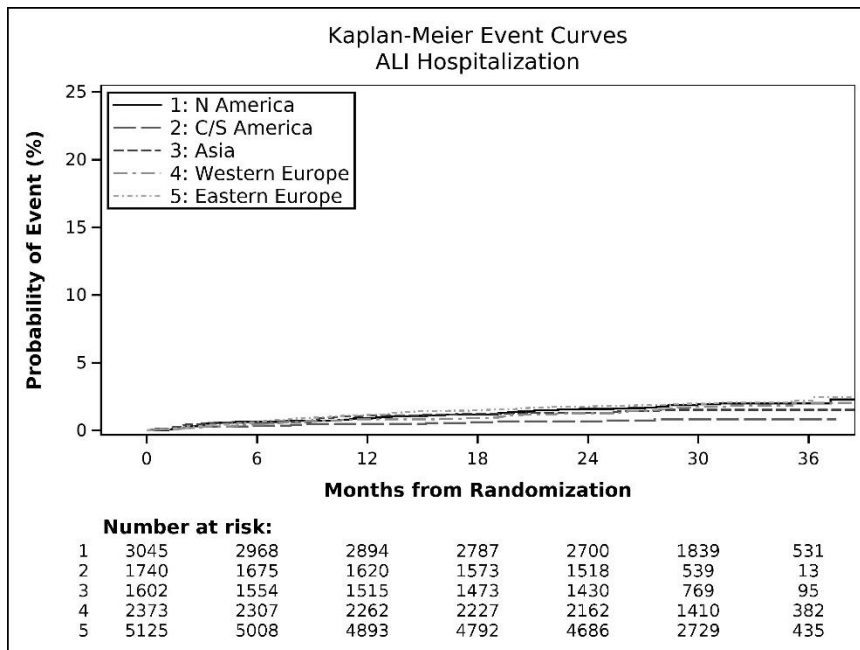

Figure S10. Kaplan Meier event curves for lower extremity revascularization

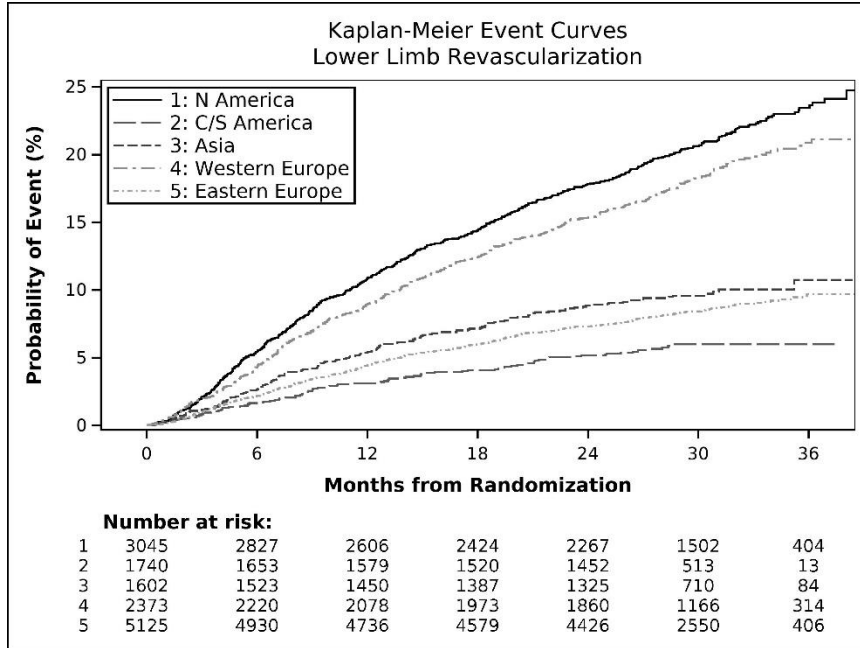

Supplement: sj-pdf-1-vmj-10.1177_1358863X211038620.pdf [file sj-pdf-1-vmj-10.1177_1358863X211038620.pdf]
